# Supplementary material for: An integrated 3-Dimensional Genome Modeling Engine for data-driven simulation of spatial genome organization
Source: HighWire-hosted journal article supplement (doi:10.1101/gr.205062.116), 2016-10-27
Supplement: Supplemental_Table_S1_final.xlsx [file Supplemental_Table_S1_final.xlsx]

## Sheet: Arkusz1
Table 1.
Cell line	Protein factors	Uniquely mapped reads	Self-ligation reads	Singletons	Clustered reads	PET clusters (PET count >= 4)
GM12878	CTCF	51103494	13274626	35071233	1721227	93409
	RNAPII	124338317	39112010	53409826	885964	113591
