# Supplementary material for: An integrated 3-Dimensional Genome Modeling Engine for data-driven simulation of spatial genome organization
Source: HighWire-hosted journal article supplement (doi:10.1101/gr.205062.116), 2016-10-27
Supplement: Supplemental_Table_S2_final.xlsx [file Supplemental_Table_S2_final.xlsx]

## Sheet: Arkusz1
Table 2.
Genomic region	Intersection [bp]	Union [bp]	Jaccard index	Number of overlaps	Pearson correlation coefficient
all	1500460949	2398619999	0.625552	4465	0.414155
Chr 1	133978989	191804452	0.698519	400	0.521653
Chr 2	120733349	206115050	0.585757	364	0.268402
Chr 3	102515171	170689051	0.600596	306	0.288857
Chr 4	82915946	154787249	0.535677	245	0.282329
Chr 5	85341725	146751892	0.581537	248	0.354665
Chr 6	93235008	138921791	0.671133	261	0.425984
Chr 7	79179486	134063743	0.590611	228	0.27168
Chr 8	73991004	120633043	0.613356	207	0.388687
Chr 9	63969979	97513296	0.656013	179	0.559674
Chr 10	70344652	112513921	0.625208	218	0.348296
Chr 11	78533188	113220941	0.693628	237	0.424931
Chr 12	75817042	120225351	0.630624	245	0.219808
Chr 13	48374378	80218851	0.60303	127	0.470452
Chr 14	45067724	75195404	0.599341	148	0.489964
Chr 15	47094759	71306483	0.660456	144	0.534964
Chr 16	44195968	65045056	0.679467	135	0.547736
Chr 17	52356287	68673181	0.762398	175	0.477758
Chr 18	40317420	66665892	0.604768	106	0.289832
Chr 19	33635581	46337413	0.725884	120	0.509894
Chr 20	42946257	56218177	0.763921	121	0.398452
Chr 21	16671413	28689431	0.581099	47	0.550906
Chr 22	23026127	31216027	0.737638	69	0.68556
Chr X	46219496	101814304	0.453959	135	0.372411
