# Supplementary material for: An integrated 3-Dimensional Genome Modeling Engine for data-driven simulation of spatial genome organization
Source: HighWire-hosted journal article supplement (doi:10.1101/gr.205062.116), 2016-10-27
Supplement: Supplemental_Table_S3_final.xlsx [file Supplemental_Table_S3_final.xlsx]

## Sheet: Arkusz1
Table 3.
Genomic region	Intersection [bp]	Union [bp]	Jaccard index	Number of overlaps	Pearson correlation coefficient
all	2062464869	2721793742	0.757759	2620	0.387892
Chr 1	170933177	217487203	0.785946	213	0.495746
Chr 2	176274796	229091900	0.76945	207	0.259256
Chr 3	145719354	187985880	0.775161	204	0.207936
Chr 4	130431212	180820688	0.721329	146	0.177135
Chr 5	130125370	173305440	0.750844	163	0.18085
Chr 6	117745096	162767591	0.723394	169	0.153519
Chr 7	112712981	148106898	0.761025	145	0.285932
Chr 8	105892547	137691701	0.769055	127	0.243449
Chr 9	90816255	108750098	0.835091	93	0.720507
Chr 10	95651775	130166340	0.734843	126	0.125518
Chr 11	101070196	125040271	0.808301	131	0.38337
Chr 12	99913706	125732244	0.794655	119	0.273263
Chr 13	63824194	91468951	0.697769	72	0.467588
Chr 14	67323941	85868627	0.784034	84	0.605173
Chr 15	58274889	77927707	0.747807	90	0.578579
Chr 16	60240692	75237617	0.800673	71	0.624917
Chr 17	54954315	73691467	0.745735	105	0.30306
Chr 18	58814001	73836505	0.796544	60	0.297963
Chr 19	40274750	50874811	0.791644	57	0.582932
Chr 20	47954286	58685848	0.817135	57	0.348676
Chr 21	24768779	33623793	0.736644	31	0.628329
Chr 22	25751384	33194718	0.775768	42	0.704801
Chr X	82997173	140437444	0.59099	108	0.165155
