# Supplementary material for: An integrated 3-Dimensional Genome Modeling Engine for data-driven simulation of spatial genome organization
Source: HighWire-hosted journal article supplement (doi:10.1101/gr.205062.116), 2016-10-27
Supplement: Supplemental_Table_S4_final.xlsx [file Supplemental_Table_S4_final.xlsx]

## Sheet: Arkusz1
Table 4.
Genomic region	Intersection [bp]	Union [bp]	Jaccard index	Number of overlaps	Pearson correlation coefficient
all	1557443958	2677682771	0.581639	4529	0.270401
Chr 1	140928623	213569118	0.659874	402	0.415667
Chr 2	128176225	227132796	0.564323	363	0.126439
Chr 3	103611021	182650595	0.567264	305	0.147403
Chr 4	86545455	178613770	0.48454	259	0.0546556
Chr 5	90246905	168850808	0.534477	265	0.177435
Chr 6	93431452	162204958	0.576009	266	0.0516741
Chr 7	83755797	147731323	0.566947	231	0.120921
Chr 8	71272104	135858513	0.524605	204	0.0861129
Chr 9	67900355	108263081	0.627179	175	0.514599
Chr 10	75710207	124899793	0.606168	233	0.241971
Chr 11	80192744	124604072	0.64358	240	0.227603
Chr 12	76309974	123024083	0.620285	233	0.164239
Chr 13	50180129	88600037	0.566367	122	0.383013
Chr 14	46909020	85120716	0.551088	149	0.39163
Chr 15	49982629	75109021	0.665468	155	0.53567
Chr 16	48356985	75000566	0.644755	135	0.479863
Chr 17	51526493	72720157	0.708559	169	0.292474
Chr 18	42240230	73857194	0.571918	116	0.10672
Chr 19	38849111	51447684	0.755119	111	0.505143
Chr 20	42508497	57947453	0.73357	127	0.278199
Chr 21	17529504	32082330	0.546391	55	0.505458
Chr 22	23230126	32693960	0.710533	70	0.642006
Chr X	48050372	135700743	0.354091	144	0.103202
