# Supplementary material for: An integrated 3-Dimensional Genome Modeling Engine for data-driven simulation of spatial genome organization
Source: HighWire-hosted journal article supplement (doi:10.1101/gr.205062.116), 2016-10-27
Supplement: SuppMat_3DNOME_final.docx [file SuppMat_3DNOME_final.docx]

**SUPPLEMENTARY MATERIALS**

**for**

***3D-GNOME: Three Dimensional Genome Modeling Engine***

***by***

***Przemyslaw Szalaj, Zhonghui Tang, Paul Michalski, Michal J. Pietal, Oscar J. Luo, Michał Sadowski, Xingwang Li, Kamen Radew,***

***Yijun Ruan & Dariusz Plewczynski***

**EXTENDED METHODS**

**I. Details of the MDS algorithm**

*2D data normalization*

Inter-chromosomal singleton heatmaps are normalized to account for the correlation between interaction frequencies and chromosome length. Inter-chromosome weights, , are defined by

where is the length of chromosome , and and are matrix indices. All data are adjusted in the following form:

This transformation causes that all intra-chromosomal data are left intact whilst for inter-chromosomal data, the bead interaction signals get amplified with the scale which is proportional to the length of either interacting chromosomes.

*Kolmogorov-Smirnov test*

Kolmogorov-Smirnov (KS) test is a probabilistic, non-parametric test to determine whether a random variable sample is drawn from a normal distribution. The test assumes that sample values are sorted in ascending order and normalized to μ=0, σ=1, and then compares the cumulative probability distribution to that of a standard normal distribution. The test reports two values: the probability, , that the sample in question can be drawn from standard normal distribution, and , the maximum difference between actual distribution value *F(x)* of normal distribution and the empirical distribution built over the sample being tested *(Xk)*. We used a maximum value difference based statistics,

*MDS specific parameters and stress functions*

MDS (see [[1](#_ENREF_1)] for details, Fig. S1) determines the optimal 3D positions, , of a set of nodes by minimizing a stress function, an example of which is

where ||.|| is the Euclidean distance and denotes values of the input matrix. We tested several stress functions - SgnRelStress, Kruskal, Sammon, SgnSammon – and found that the results were relatively insensitive to the choice of stress function. We thus used SgnRelStress (the standard stress) in all work presented here.

We preset maximum number of iterations to 100 000, but the algorithm typically terminated between 200 and 1000 iterations, when no improvement in the target function was detected (threshold set to the value of ). All MDS simulations used random initial conditions.

We implemented MDS using the Python library Orange Data Mining Toolbox [2]. Most parameters were left as their default values, but we changed the number of main loop iterations (iter=100 000) and the correction threshold for halt condition (eps=). This stop condition biases the system for heavy optimization, and is the main reason our results were insensitive to different choice for the stress function.

Ensembles of structures are simulated with a separate script that implements a multi-start technique as an extension of the Orange package, and uses the SKLearn library [[3](#_ENREF_3)] for random number generation. For each ensemble we simulated 10 structures but reduced the number of iterations to 10 000, in order to fix the total number of iterations at 100 000 for all the approaches. This implementation uses the SMACOF stress function, and the eps threshold was lowered to to speed up ensemble generation. We note, however, that the code is open source and all parameters can be easily modified by the user.

*Extended rationale for using triangular norms*

Raw or normalized chromatin contact data are given as probability estimates. Therefore, the probability theory-driven measures of information aggregation can be easily utilized in order to aggregate this noisy and approximate data. The matrix itself cannot be treated as an unambiguous and binary entity, neither be transformed to one without significant assumptions that may cause the significant information loss. The contact frequency map thus represents a fuzzy proximity graph of bead interactions, given the scale (bead size) or interaction intensity threshold (defined by the unknown physical distance threshold). Since we could (as in Pietal et al. [[1](#_ENREF_1)], with negligible correction factor) assume that contact events are independent from one another, i.e. if bead *a* and *b* interaction has probability *p* and bead *b* and *c* interaction - probability *q*, classically the formula for probability of *a* interacts with *c* is *p*q*. This is realized by the powering scheme already (see therein). Still, if we want to know the actual “path length”, we could only report “expected path length” which too, involves probabilities in it. Simply put, if there are probabilities on the path connecting beads: *a-b-c-d-e-f* or so, we should not simply “add” the probabilities on respective edges (i.e. matrix entries).

Instead, we need to aggregate them by using any suitable “fuzzy and” and “fuzzy or” operators. Such operators are called T-norms or S-norms and there can be made a variety of such norms, they only need to follow the axioms required. Our graph distance calculation protocol implemented before classical MDS builds a graph distance map. Its values are natural numbers and they reflect the degree of the proximity between any pair of beads, given the input data. This is the actual distance map (over a fuzzy graph however) and it is similar in characteristics with the real distance map of chromatin 3D model, as it was shown in detail both in Pietal and Tenenbaum [[4](#_ENREF_4)] works quoted in the text. Both graph distance matrix and the 3D models are real, the data is also real as it comes from the real experiments however it has a fuzzy nature, non-intuitive though, and thus ought to be addressed accordingly. In its general formulation, if we simply put a unweighted, undirected and connected graph as one representing bead interactions, this algorithm would run and produce output

(graph distance) just like any classical algorithm, i.e. Floyd-Warshall [[5](#_ENREF_5), [6](#_ENREF_6)].

**II. Details of the multi-scale Monte Carlo algorithm**

*Defining chromatin contact domains and segments*

For a given chromosome, let be a set of anchors ordered by the genomic position. Let denote a set of all PET clusters for the chromosome and let (with ) be a PET cluster anchored at the anchors and . We will say that spans anchor if and . We will say that there is a *gap* between two consecutive anchors and if there is no cluster spanning or if the sum of PET interactions spanning that region is less than a threshold, set as the fifth percentile. A CCD is defined as a genomic region spanning from the beginning of the anchor to the end of the anchor given that there is a gap between and , and between and , but there is no gap between any of pairs , , …, () (brackets for clarity). We extend our definition of a gap to include two special boundary cases: we will say that there is always a gap between and and between and , where and are fictional anchors at the very ends of the chromosome. We employ a simple procedure to identify all the gaps. Let be a number of PET clusters spanning anchor . We set and we find all the values iteratively using the following relation: . Intuitively, for step we subtract the number of PET clusters ending at the anchor and add the number of clusters starting at the same anchor from the value from the step . A gap is identified when falls below the threshold value.

To cluster CCDs into segments we first used a simple, iterative bottom-up clustering algorithm with the following procedure. Initially, all CCDs were treated as separate segments. At every step of the algorithm two neighboring segments were chosen to be merged into one aggregated segment based on their genomic size and the distance between them. Small segments lying close to each other were merged before longer and more distant ones. Segments couldn’t be merged after attaining some predefined length (of the magnitude of a few Mb), or if the size of the resulting segment would be too big. The algorithm stopped when no further merging was possible.

While this approach generated appropriately sized segments, we felt that in some cases the clustering was counter-intuitive. Because this procedure is to be done only once for a dataset we decided to make the split manually. We used a simple tool to visualize the location of PET anchors and clusters, and then decided on the most natural clustering considering the size of CCDs, number of interactions within CCDs, size of gaps between them, the relative size of the resulting segments, and the overall data structure.

*General Heatmap Construction*

For all levels, the bins of the appropriate heatmaps correspond directly to the nodes of our model hierarchy, and to the 3D structure beads. As discussed in the main text, the bins of our heatmaps are based on underlying biological features as opposed to a uniform bin size approach.

Raw heatmap values, , are obtained using only singleton data between regions and , where, as noted previously, singletons are defined as all PET clusters with count less than 4 and those with long spans which are not used for high resolution modeling. As singletons have different PET counts, , we may consider different weighting schemes when adding them to the raw heatmap values. We constructed heatmaps using a simple linear proportionality where weight and we examined several different non-linear weighting schemes, such as and , but we observed no significant differences in the results, probably because true singletons (with ) are much more abundant than all other PET clusters classified as singletons. Thus, we decided to use the first approach as it does not assume any particular structure of the count-weight relation and relies on raw counts only.

*Chromosome and Segment Heatmaps*

On the chromosome level each bin represents a chromosome. For each chromosome we note the genomic position of the leftmost and rightmost singleton. These positions are set as the genomic boundary of the bins and are used to calculate their size. The matrix of raw counts is normalized for the bin length to obtain a matrix , where is a genomic length of bin . We set the diagonal terms . Finally, we scale all the values so that the average of non-diagonal entries is equal to 1. Matrix is then used in the simulation, as will be described later.

The procedure for the segment and chromosomal level is very similar. On the segment level bins boundaries are set to the midpoints between neighboring segments (as before, the start of the first bin and the end of the last one are defined by the positions of the leftmost and rightmost singletons). As previously, we calculate and normalize it by the bins lengths to obtain . Now we scale it so that the average of near-diagonal values is equal to 1, and we set for all such that . Here, is a parameter that controls the width of the diagonal band (we choose to normalize for near-diagonal entries because the results are more stable). By default we set , but may also be useful to remove some potential bias related to a non-uniform distribution of short-range singletons.

*Anchor and Subanchor Heatmaps*

Subanchor heatmaps consist of two categories of bins - one corresponding to the anchor beads and one that corresponds to the sub-anchor beads. Let and denote the genomic boundary position for an anchor . The boundaries of the anchor bins are simply and , i.e. they are defined by the anchors boundaries. Boundaries of the subanchor beads are obtained by splitting the genomic span corresponding to the chromatin loops into a number of equally sized segments. Formally, the sub-anchor bins contained between anchors and have boundaries in the positions for , where is a parameter denoting a number of subanchor beads per loop (the higher the parameter, the more flexible the loops are). For an interaction block with anchors we obtain a heatmap with bins, in which bins correspond to anchors, and the rest to the subanchors beads.

**III. Model validation and parameter selection**

In our model we assume a power law relation between the interaction frequency and the physical distance on the megabase resolution, but there is evidence that the exact relationship may differ between organisms, cell lines or even at different stages of the cell cycle [[7](#_ENREF_7)]. Thus, we also validated our models and estimated the scaling exponent with a non-parametric ranking approach, using only the widely accepted assumption that the interaction frequency is inversely related to the physical distance. Generally, the approach consists of generating a structure from a heatmap, rank-ordering both the heatmap IFs and the physical distances from the model, and then calculating the Spearman correlation coefficient between the two rank-ordered lists. This correlation describes how well the structure reflects the imposed distance ordering, and it can be used to fit the parameters in the functional relationship between IFs and physical distances. We use this approach to estimate the scaling exponent, , in our assumed functional relationship . We varied α from 0.05 to 1.5 in steps of 0.05, and for each value we generated 100 structures and calculated their correlation to the original heatmap. The results are presented in Fig. S17A, and show that the best correlation is obtained for . The correlation strength for these values is very high () and is very uniform across simulation runs, and we used values in this range for all other models.

We also compared the low resolution structures generated by our two approaches, namely, SA and MDS. A comparison of the results obtained from each of these pipelines is presented in Fig. S3C-E. In general, the differences in the structures produced using the two methods were similar to the differences observed when constructing multiple models using the same method (see section *Ensemble Analysis*), and we conclude that the two methods are in agreement.

Lastly, we investigated the sensitivity of the MDS approach to different graph distance renormalization methods. Specifically, we used several different T-norms and S-norms to renormalize the same IF heatmap, and compared the structures derived from the different graph distance maps. Fig. S6 shows the results for all 23 chromosomes when starting with ChIA-PET singleton data, and, Fig. S7 shows similar results using HiC data. In all cases the global structure of the chromosomes are insensitive to the specific graph distance method.

**IV. *Noise analysis for Multidimensional Scaling and multi-scale Monte Carlo algorithms***

We tested the robustness of MMC and MDS to noise in the heatmaps using both artificial and experimental data. The artificial data was constructed as described in the previous section. Noise was introduced by adding to each heatmap entry a random value drawn from a Gaussian distribution with zero mean and a variable standard deviation, and we use the standard deviation as a measure of the noise level. For each noise level we created 10 perturbed matrices, and for each perturbed matrix we created an ensemble of 10 structures. Each of these structures was compared with each member of the ensemble reconstructed from the denoised initial matrix.

Similarity rate between two three-dimensional chromatin models is calculated using both RMSD measure and our custom contact measure. The distance between structures *A* and *B* in the contact measure is given by , where is a Euclidean distance between beads *i, j* in structure *A*, and is the expected distance between these beads obtained from the artificial structure. The serves as a normalization factor here, and in case it is unknown (i.e. when the experimental data is used, and we do not know the expected distances between pairs of loci) we simply use . We note that while RMSD is a popular measure it may not be the best choice for chromosome structural modeling because it reports large values for structures related through mirror symmetry, which are indistinguishable from the point of view of the contact heatmaps. Thus, we report both the RMSD and the contact measure, which we feel is a better measure for these systems. It is worth noting that one should be very careful when comparing both values as some pairs of 3D structures may generate high RMSD and very low contact measure value at the same time due to chirality.

The results of the analysis are presented on Fig. S19-S22. The similarity measure values calculated between structures belonging to the ensembles reconstructed from perturbed matrices of different noise levels and structures reconstructed from an initial matrix are plotted against ratios of noise levels to the mean contact frequency value of the initial matrix. Distributions plotted for the noise level equal to zero show the variability of structures within an ensemble.

In Fig. S19and S20we present the results of the analysis performed on artificially generated data. Fig. S21and S22show the results for the experimental data. In all figures the plots are shown along with visualizations of aligned three-dimensional models. The plots demonstrate the stability of MMC and MDS solutions as a function of a noise level. The distances between 3D models are calculated both in RMSD and contact measures. Note that for the RMSD measure we removed the effects of mirror symmetries by aligning each structure generated with noisy data to all structures generated without noise, and only calculated the RMSD with the best aligning structure. In the visualizations the structures reconstructed from perturbed matrices are aligned to a member of the ensemble reconstructed from an initial matrix which has the highest, among the whole ensemble, similarity to all noisy structures. We call this structure the centroid (colored cyan in the figure).

We selected Chromosome 3 (Fig. S22) and Chromosome 14 (Fig. S21) to show how our algorithms perform in reconstructing from real data both larger structures (Chromosome 3: 93 nodes) and smaller structures (Chromosome 14: 26 nodes). Similarly, we show how the algorithms reconstruct synthetic structures on two examples, one with 100 nodes (Fig. S20) one with 50 nodes (Fig. S19).

The MDS plots have two features which require clarification. First, we notice that a small amount of noise is sufficient to greatly increase the average RMSD and/or contact deviation. We believe that this reflects the fact that the noise modifies the normal distribution of the heatmap values, which in turn alters the cutoff derived by the denoising routine. This will change the number of interactions in the noisy structures compared to the base structure, which will automatically introduce differences from the base structure.

Secondly, we notice that the ensemble variance is greatly reduced by a small amount of noise. This reflects the fact that the noise can introduce unphysical contacts whose presence greatly restricts the sample space available in the simulation. Thus, the algorithm generates little variability between the models, yielding an ensemble of nearly identical structures.

**V. *Comparison of genomic regions from CCDs and TADs***

We compared the GM12878 CCDs, GM12878 TADs called in [[8](#_ENREF_8)] and human IMR90 fibroblast TADs downloaded from Bing Ren laboratory web pages as reported in [[9](#_ENREF_9)] both visually and numerically (we will refer to the last two domain sets as Rao TADs and IMR90 TADs respectively). The results are presented in Fig. S24 – S27.

We used the Hilbert space-filling curve [[10](#_ENREF_10)] to visualize distribution of the domains in the entire genome and in single chromosomes separately. This continuous fractal injective mapping from a unit segment to a unit square has a very important property for our application – most of the preimages of points close to each other in the codomain are also close to each other in the domain.

We used 9th order approximation to the Hilbert curve - a mapping of a 262144 point vector to a 512 x 512 pixel square. To represent the entire genome by such vector, we split the genome sequence into bins of 11583 bp and set to 1 all the components of the vector which corresponded to bins covered by a CCD or a TAD in more than 50%. Thus we obtained three vectors of length 262144 that can be easily compared with one another.

In theory we could compare all three at the same time, by using them as a "red", "green" and "blue" channels of a 512 x 512 pixel image, but in practice this made the visualization completely illegible. This is why we decided to perform pairwise comparisons using only "red" and "green" channels. The results are presented in Figures S24-S27.

Together with Hilbert curve plots we present Venn diagrams showing the relations between the three domain sets being compared. To improve legibility the areas in the diagrams initially denoted by the number of base pairs were changed to the percentage of area of the union of genomic regions.

For numerical comparison of CCDs with Rao TADs and IMR90 TADs we used the Jaccard index [[11](#_ENREF_11), [12](#_ENREF_12)] and the Pearson correlation coefficient between the vectors used for creating the Hilbert curves. The results are collected in Tables 2-4.

**SUPPLEMENTARY TABLES**

**Table 1.**

Summary of the CTCF and RNAPII ChIA-PET libraries for GM12878 cell line.

**Table 2.**

Comparison of GM12878 CCDs [[13](#_ENREF_13)] and GM12878 TADs called in [[8](#_ENREF_8)].

**Table 3.**

Comparison of GM12878 CCDs [[13](#_ENREF_13)] and human IMR90 fibroblast TADs downloaded from Bing Ren laboratory web pages as reported in [[9](#_ENREF_9)].

**Table 4.**

Comparison of GM12878 TADs called in [[8](#_ENREF_8)] and human IMR90 fibroblast TADs downloaded from Bing Ren laboratory web pages as reported in [[9](#_ENREF_9)].

**REFERENCES**

1. Pietal, M.J., J.M. Bujnicki, and L.P. Kozlowski, *GDFuzz3D: a method for protein 3D structure reconstruction from contact maps, based on a non-Euclidean distance function.* Bioinformatics, 2015. **31**(21): p. 3499-505.

2. Demšar, J., et al., *Orange: data mining toolbox in python.* The Journal of Machine Learning Research, 2013. **14**(1): p. 2349-2353.

3. Pedregosa F, et al., *Scikit-learn: Machine learning in Python.* The Journal of Machine Learning Research, 2011. **12**: p. 2825-2830.

4. Tenenbaum, J.B., V. de Silva, and J.C. Langford, *A global geometric framework for nonlinear dimensionality reduction.* Science, 2000. **290**(5500): p. 2319-23.

5. Lesne, A., et al., *3D genome reconstruction from chromosomal contacts.* Nat Methods, 2014. **11**(11): p. 1141-3.

6. RW, F., *Algorithm 97: shortest path.* Communications of the ACM, 1962. **5**(6): p. 345.

7. Varoquaux, N., et al., *A statistical approach for inferring the 3D structure of the genome.* Bioinformatics, 2014. **30**(12): p. i26-33.

8. Rao, S.S., et al., *A 3D Map of the Human Genome at Kilobase Resolution Reveals Principles of Chromatin Looping.* Cell, 2014. **159**(7): p. 1665-1680.

9. Dixon, J.R., et al., *Topological domains in mammalian genomes identified by analysis of chromatin interactions.* Nature, 2012. **485**(7398): p. 376-380.

10. Anders, S., *Visualization of genomic data with the Hilbert curve.* Bioinformatics, 2009. **25**(10): p. 1231-5.

11. Quinlan, A.R., *BEDTools: The Swiss-Army Tool for Genome Feature Analysis.* Curr Protoc Bioinformatics, 2014. **47**: p. 11 12 1-34.

12. Quinlan, A.R. and I.M. Hall, *BEDTools: a flexible suite of utilities for comparing genomic features.* Bioinformatics, 2010. **26**(6): p. 841-2.

13. Tang, Z., et al., *CTCF-Mediated Human 3D Genome Architecture Reveals Chromatin Topology for Transcription.* Cell, 2015. **163**(7): p. 1611-1627.
